# Supplementary material
Source: PubMed Central journal article supplement (PMC2814521)

# First Multi-gram Preparation of SCP-123, A Novel Water Soluble Analgesic

*Lei Miao<sup>†</sup>, Liang Xu<sup>†</sup>, Kenneth W Narducy<sup>‡</sup> and Mark L. Trudell<sup>†\*</sup>*

Department of Chemistry, University of New Orleans, New Orleans, LA 70148

St. Charles Pharmaceuticals, 650 Poydras Street, Suite 2830, New Orleans, LA 70130-6050

\*Author for correspondence. Tel: 504-280-7337; FAX: 504-280-6860; Email:  
[mtrudell@uno.edu](mailto:mtrudell@uno.edu).

## **Supporting Information (6 pages)**

<sup>1</sup>H NMR **4**, **5** and **12**

HPLC Conditions

LC-ESI-MS spectrum of **12**.

<sup>1</sup>H NMR Spectrum of SCP-123 (4) in DMSO-d<sub>6</sub>.

SCP-123  
(UNO-5/29/08)

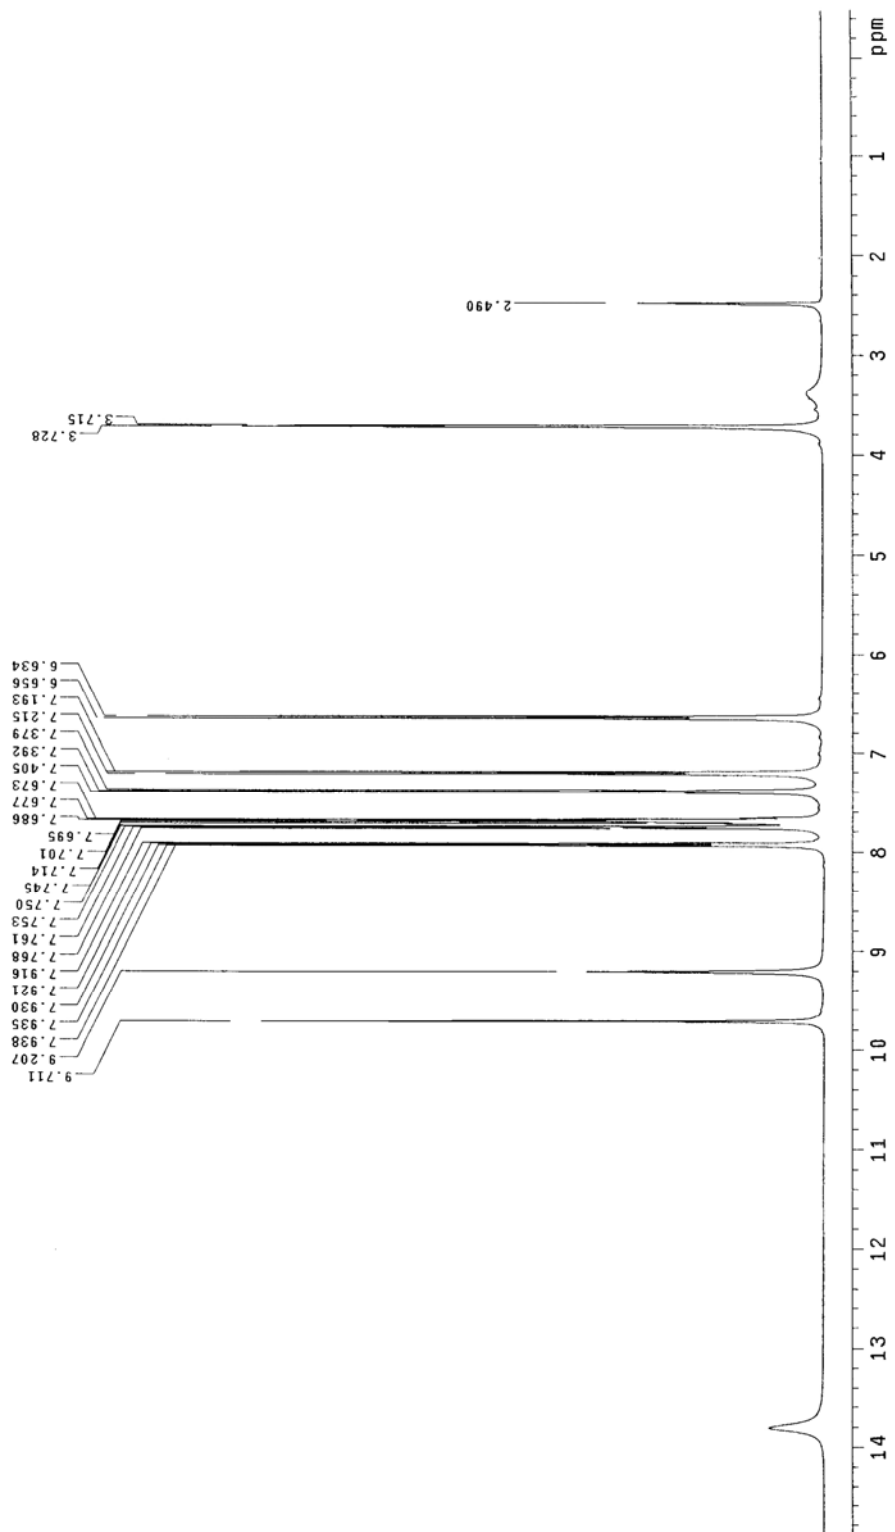

$^1\text{H}$  NMR Spectrum of SCP-123ss (5) in DMSO- $d_6$ .

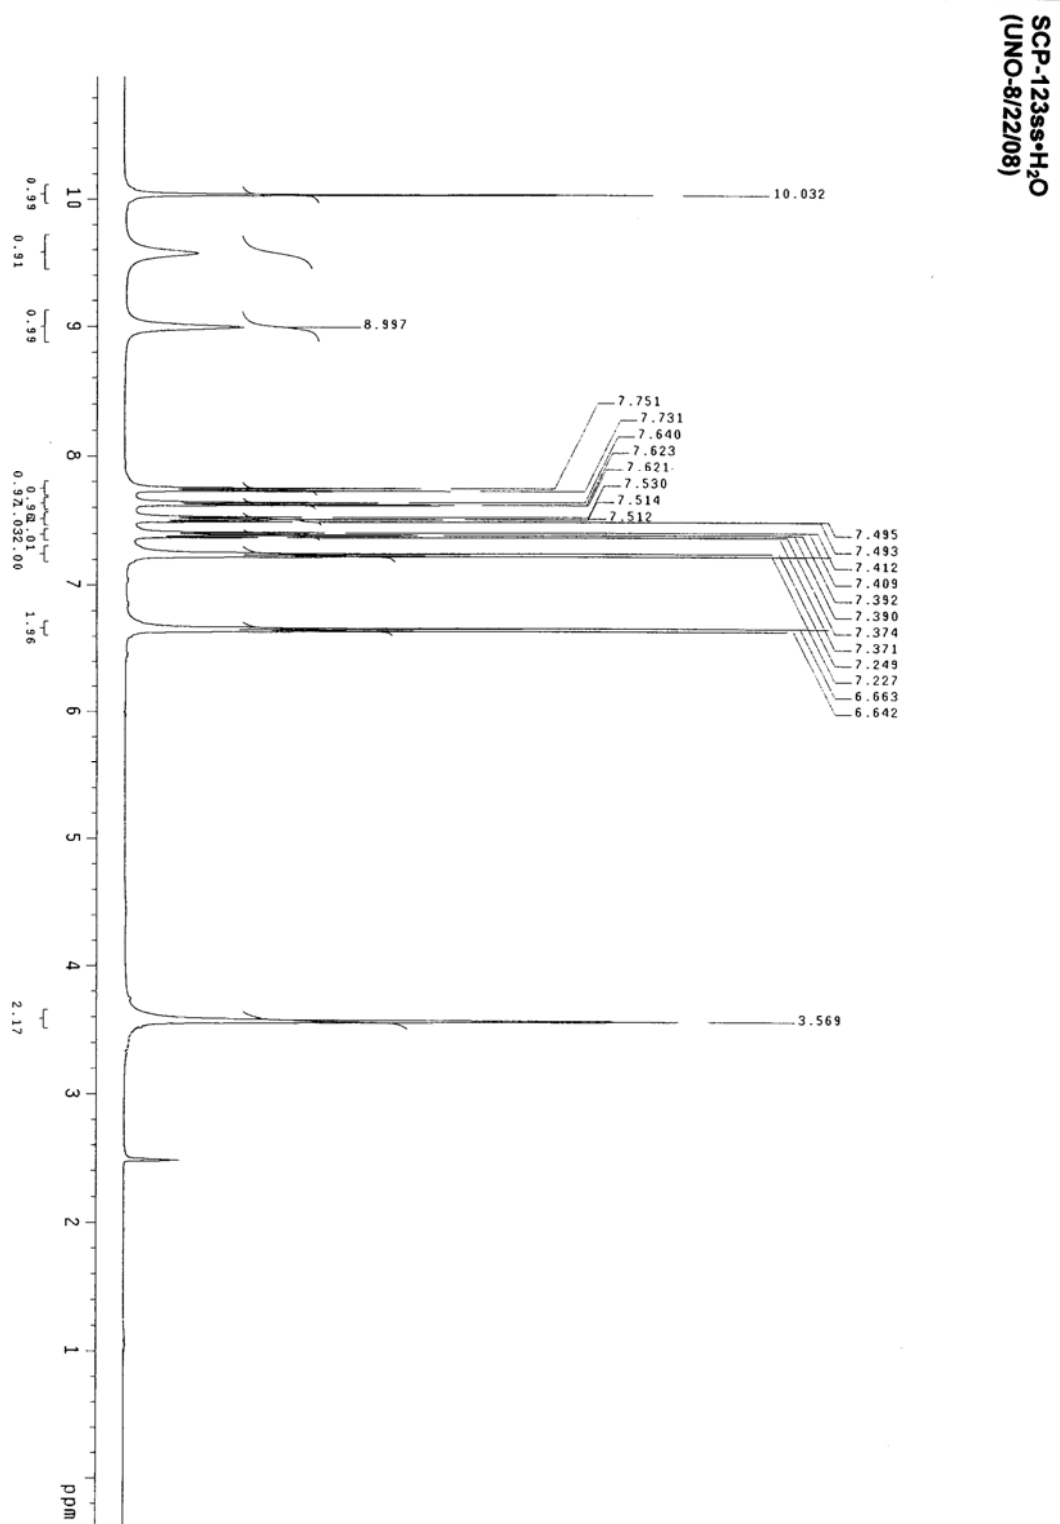

$^1\text{H}$  NMR Spectrum of **12** in  $\text{DMSO-d}_6$ .

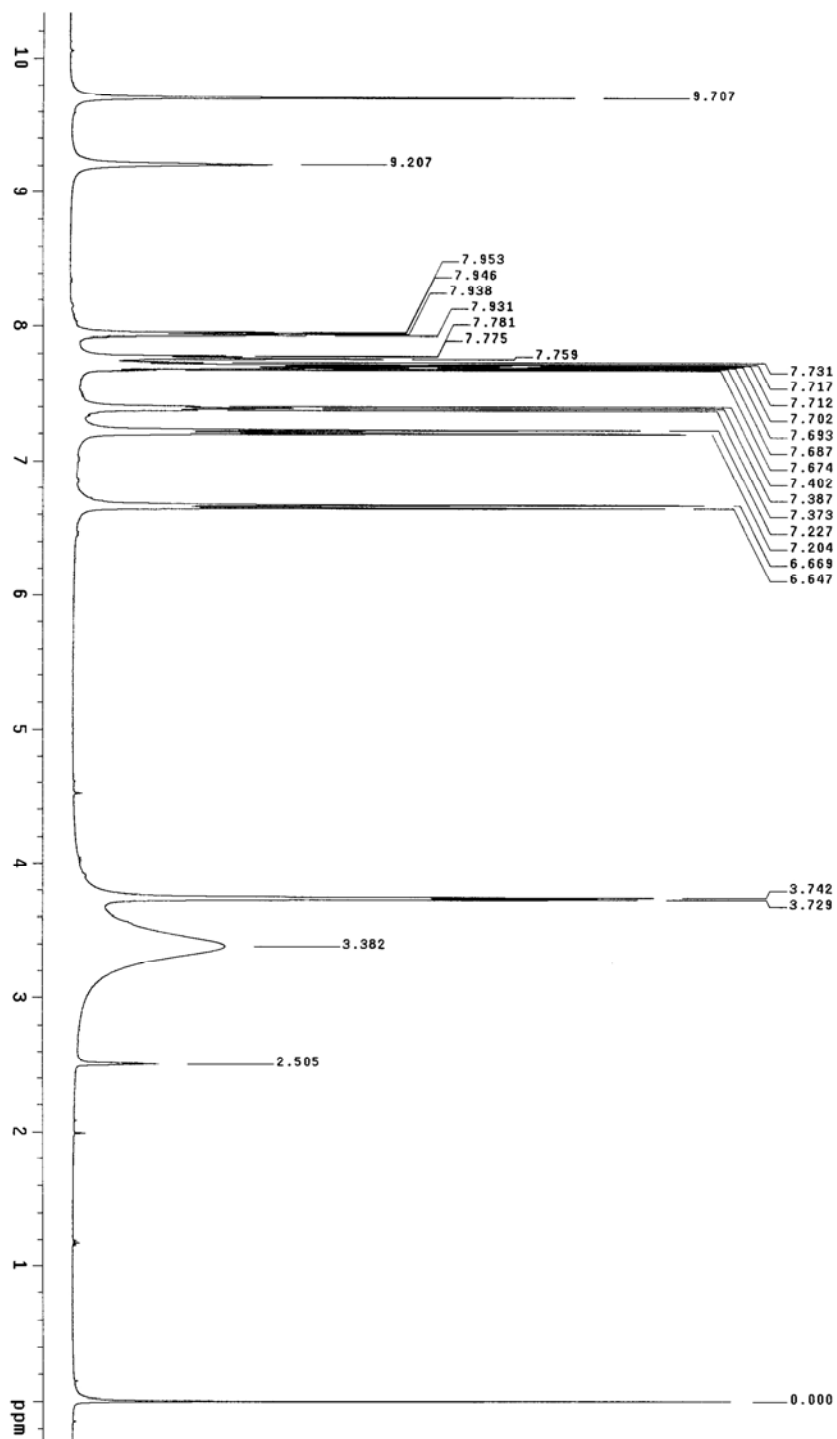

## **HPLC ANALYSIS**

### **1. REAGENTS AND INSTRUMENTATION**

- Trifluoroacetic acid, HPLC Grade Aldrich.
- Acetonitrile HPLC grade EM Science.
- HPLC Waters 501/486 Tunable Detector
- Column: Waters Nova-Pak C18 (3.9 x 150 mm) Steel Analytical.

### **2. CROMATOGRAPHIC CONDITIONS**

- Flow: 1.0 ml/min
- Column Temperature 25<sup>0</sup>C
- Volume injection: 5 µl
- Detector: Ultraviolet absorption- wavelength 254 nm.

Mobile phase: Gradient, **Table 1.**

A. TFA 0.1 % in acetonitrile

B. TFA 0.1% in water.

**Table 1: Gradient.**

| Time (min) | %A  | %B  |
|------------|-----|-----|
| 0          | 0   | 100 |
| 5          | 0   | 100 |
| 30         | 100 | 0   |
| 32         | 100 | 0   |
| 33         | 0   | 100 |
| 45         | 0   | 100 |

### **3. RETENTION TIME**

| Compound  | t <sub>R</sub> (min)* |
|-----------|-----------------------|
| <b>3</b>  | 3.1                   |
| <b>4</b>  | 15.8                  |
| <b>12</b> | 17.0                  |

\*Average of three runs.

## LC-ESI-MS IDENTIFICATION OF DIMER 12

LC-TSQ Quantum Instrument (Thermo-Finnigan) coupled to Surveyor, equipped with electro-spray ionization (ESI)

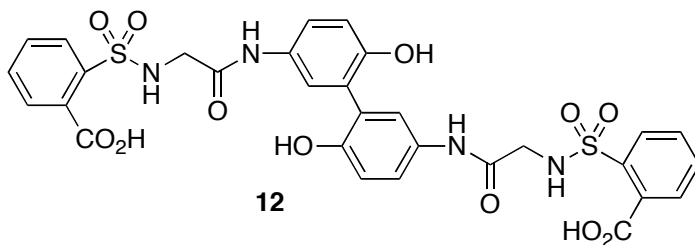

Chemical Formula:  $C_{30}H_{26}N_4O_{12}S_2$   
MW: 698.68

### Q1 Full Scan

JMM-1-28 Mark-2 13Feb04 #43 RT: 0.64 AV: 1 NL: 1.24E7  
T: - p sld=10.00 Q1MS [00.00-1000.00]

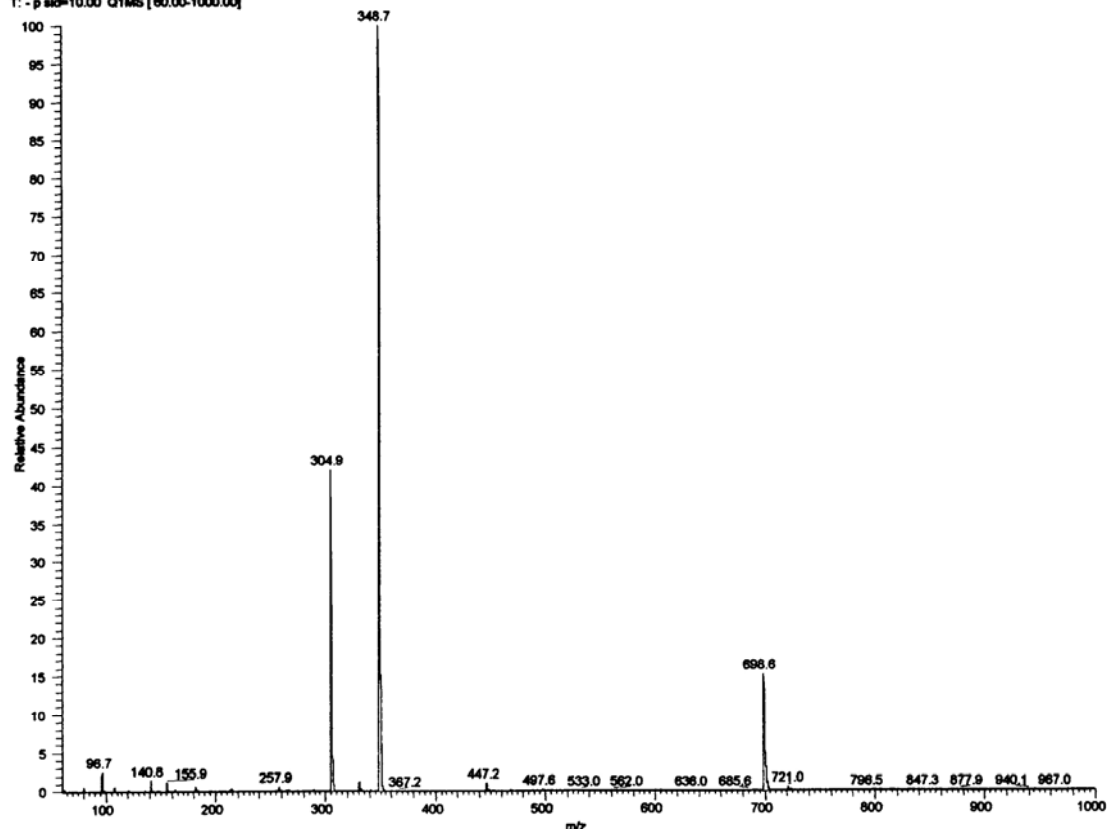

Supplement: NIHMS128192-supplement-1_si_001.pdf [file NIHMS128192-supplement-1_si_001.pdf]
